# Supplementary material for: A new 3D POMOF with two channels consisting of Wells–Dawson arsenotungstate and {Cl4Cu10(pz)11} complexes: synthesis, crystal structure, and properties
Source: Royal Society of Chemistry journal article supplement (doi:10.1039/c7nj04854h), 2018-01-01
Supplement: c7nj04854h1.pdf [file c7nj04854h1.pdf]

## Electronic Supplementary Information (ESI†)

### A new 3D POMOF with two channels consisting of Wells-Dawson arsenotungstate and $\{\text{Cl}_4\text{Cu}_{10}(\text{pz})_{11}\}$ complexes: synthesis, crystal structure, and properties

Bo-Wen Cong,<sup>[a]</sup> Zhan-Hua Su\*,<sup>[a]</sup> Zhi-Feng Zhao\*<sup>[b]</sup> Wen-Qi Zhao,<sup>[a]</sup> Xiu-Juan

Ma,<sup>[a]</sup> Qiu Xu<sup>[a]</sup> and Li-Juan Du<sup>[a]</sup>

<sup>a</sup>Key Laboratory of Photochemical Biomaterials and Energy Storage Materials, Heilongjiang Province, College of Chemistry and Chemical Engineering, Harbin Normal University, Harbin 150025, China

<sup>b</sup>College of Material Science and Engineering, Heilongjiang University of Science and Technology, Harbin 150022, China.

#### Table of contents:

##### Section I: Figures S1-S8

1. **Fig. S1** The IR spectrum of compound **1**.
2. **Fig. S2** The TG curve of compound **1**.
3. **Fig. S3** The UV-vis spectrum of compound **1** in solid state at room temperature.
4. **Fig. S4** The XPS spectra of compound **1**.
5. **Fig. S5** N<sub>2</sub> sorption isotherm of compound **1** at 77 K (P<sub>0</sub> = 1 atm).
6. **Fig. S6** The PXRD contrast curves of compound **1**.
7. **Fig. S7** Diffuse reflection spectrum of *Kubelka-Munk* (K-M) function versus energy (eV) of compound **1**.
8. **Fig. S8** Absorption spectra of the RhB aqueous solution during the photodegradation with (NBu<sub>4</sub>)<sub>6</sub>[As<sub>2</sub>W<sub>18</sub>O<sub>62</sub>] power.
9. **Fig. S9** The IR spectra of compound **1** before and after cycle reaction.

##### Section II: Table S1-S3 and Photocatalytic experiments

1. **Table S1** Selected bond lengths (Å) and bond angles (°) of compound **1**.
2. **Table S2** Selected hydrogen bond lengths ( ) and bond angles (°) of compound **1**
3. **Table S3** The BVS calculation result of As, W, and Cu atoms in compound **1**.

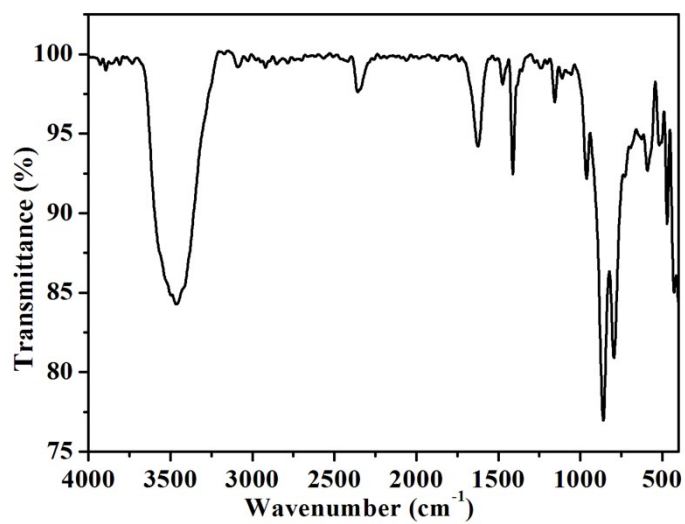

Fig. S1 IR spectrum of compound 1.

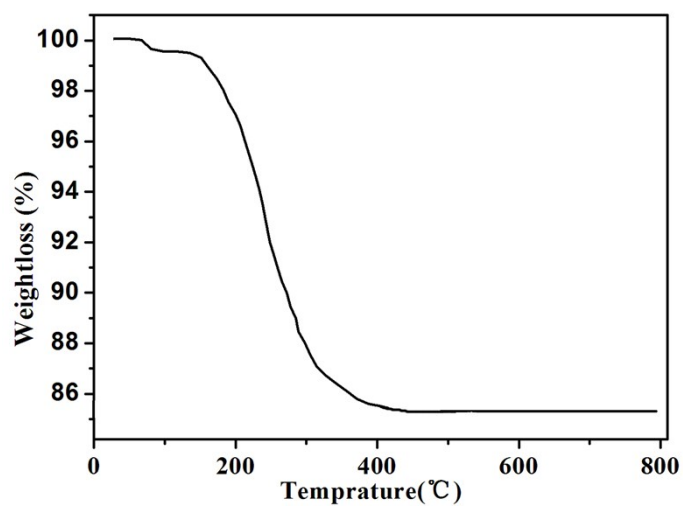

Fig. S2 The TG curve of compound 1.

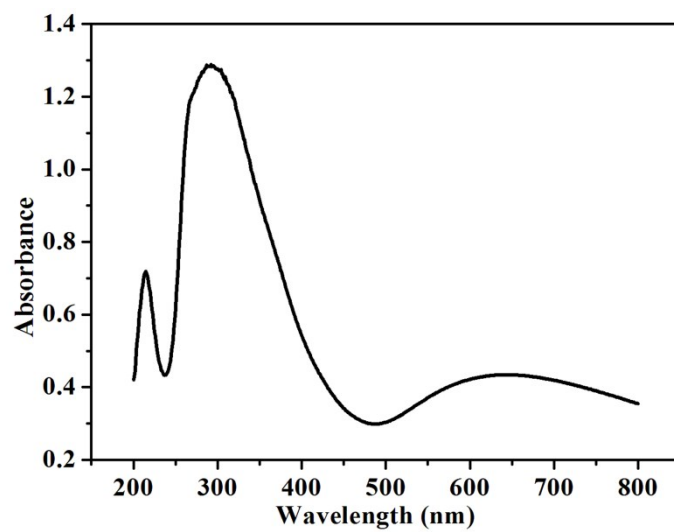

Fig. S3 The UV-vis spectrum of compound 1 in solid state at room temperature.

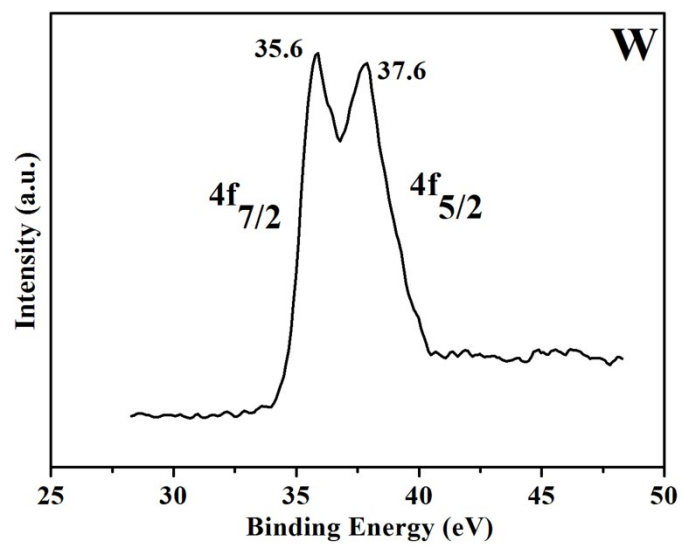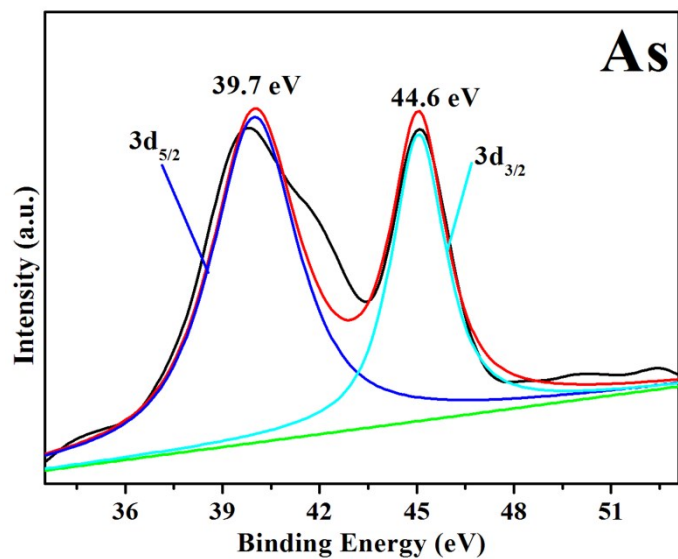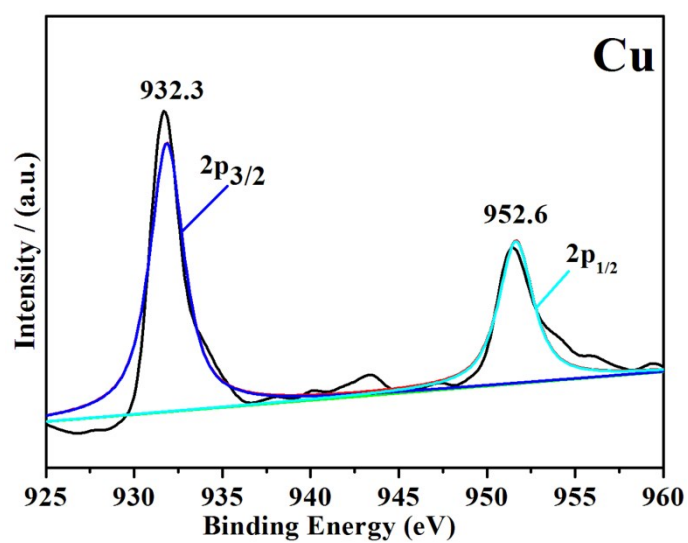

Fig. S4 The XPS spectra of compound 1.

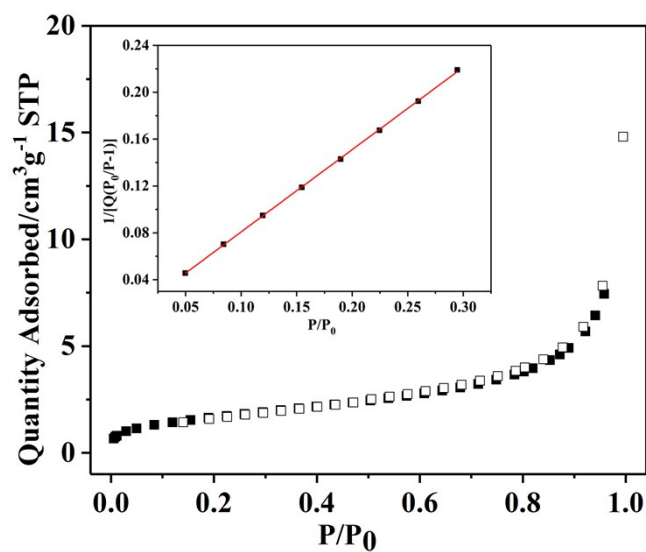

Fig. S5 N<sub>2</sub> sorption isotherm of compound 1 at 77 K ( $P_0 = 1$  atm).

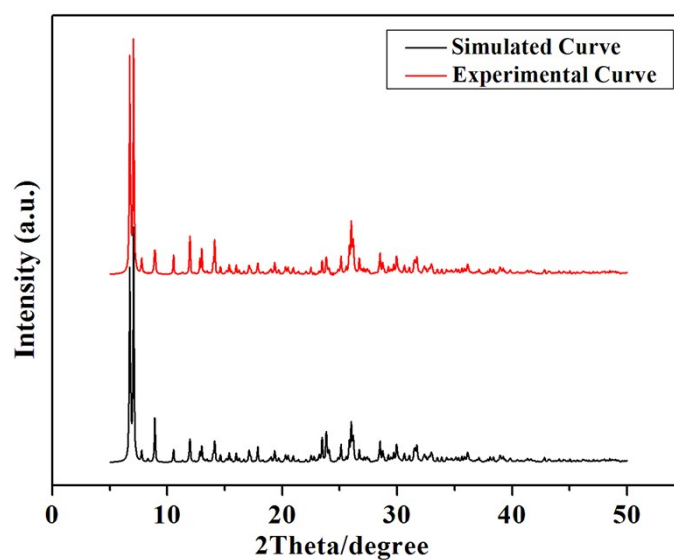

Fig. S6 The PXRD contrast curves of compound 1.

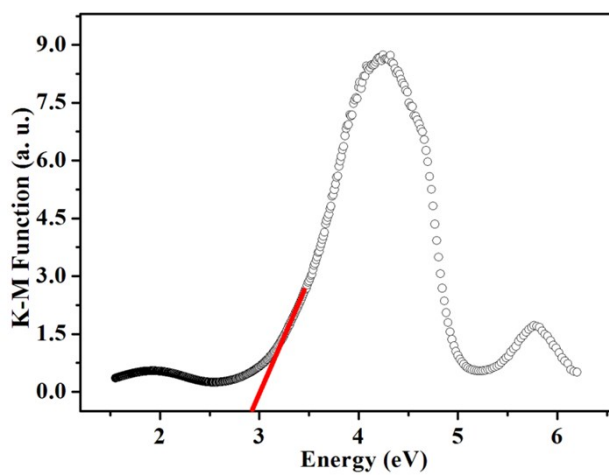

Fig. S7 Diffuse reflection spectrum of *Kubelka-Munk* (K-M) function versus energy (eV) of compound 1.

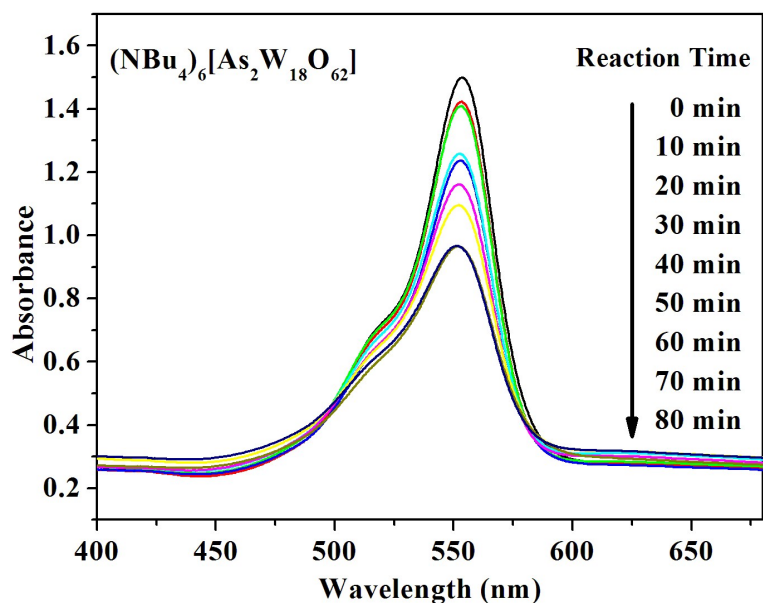

**Fig. S8** Absorption spectra of the RhB aqueous solution during the photodegradation with  $(\text{NBu}_4)_6[\text{As}_2\text{W}_{18}\text{O}_{62}]$  power

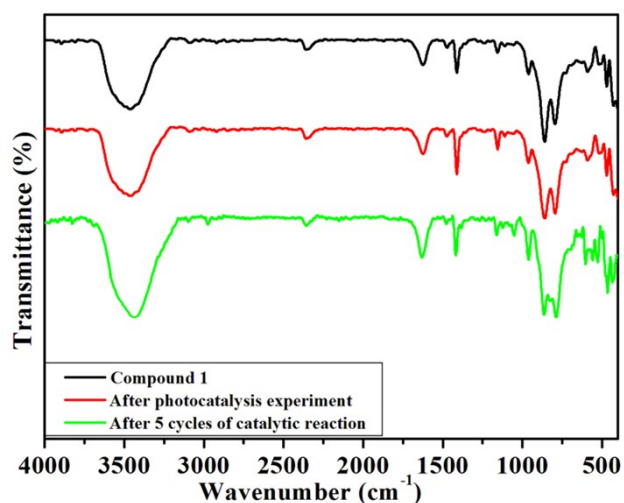

**Fig. S9** The IR spectra of compound 1 before and after cycle reaction.

**Table S1** Selected bond lengths ( $\text{\AA}$ ) and bond angles ( $^\circ$ ) of compound 1

| Compound 1 |          |            |          |            |          |
|------------|----------|------------|----------|------------|----------|
| W(1)-O(9)  | 1.865(7) | W(1)-O(2)  | 1.890(7) | W(1)-O(4)  | 1.940(7) |
| W(1)-O(7)  | 1.972(8) | W(1)-O(1)  | 2.337(7) | W(1)-O(31) | 1.690(8) |
| W(2)-O(1)  | 2.372(7) | W(2)-O(2)  | 1.956(8) | W(2)-O(3)  | 1.925(7) |
| W(2)-O(29) | 1.919(7) | W(2)-O(14) | 1.838(8) | W(2)-O(30) | 1.711(7) |
| W(3)-O(1)  | 2.398(6) | W(3)-O(5)  | 1.941(7) | W(3)-O(4)  | 1.901(7) |
| W(3)-O(16) | 1.885(8) | W(3)-O(28) | 1.704(7) | W(3)-O(3)  | 1.907(8) |
| W(4)-O(27) | 1.709(8) | W(4)-O(26) | 1.884(7) | W(4)-O(6)  | 1.898(6) |

|                     |           |                      |           |                    |           |
|---------------------|-----------|----------------------|-----------|--------------------|-----------|
| W(4)-O(18)          | 1.925(7)  | W(4)-O(5)            | 2.026(8)  | W(4)-O(17)         | 2.315(7)  |
| W(5)-O(25)          | 1.715(8)  | W(5)-O(6)            | 1.891(6)  | W(5)-O(26)#1       | 1.897(7)  |
| W(5)-O(10)          | 1.911(7)  | W(5)-O(7)            | 1.974(7)  | W(5)-O(8)          | 2.269(7)  |
| W(6)-O(12)          | 1.717(8)  | W(6)-O(11)           | 1.888(8)  | W(6)-O(22)#1       | 1.888(7)  |
| W(6)-O(10)          | 1.914(7)  | W(6)-O(9)            | 1.977(7)  | W(6)-O(8)          | 2.316(7)  |
| W(7)-O(24)          | 1.701(7)  | W(7)-O(20)           | 1.865(7)  | W(7)-O(15)         | 1.898(7)  |
| W(7)-O(21)#1        | 1.927(7)  | W(7)-O(14)           | 1.998(8)  | W(7)-O(13)         | 2.304(7)  |
| W(8)-O(19)          | 1.704(7)  | W(8)-O(18)           | 1.906(7)  | W(8)-O(15)         | 1.908(7)  |
| W(8)-O(11)#1        | 1.910(8)  | W(8)-O(16)           | 1.951(8)  | W(8)-O(17)         | 2.287(7)  |
| As(1)-O(13)         | 1.679(7)  | As(1)-O(17)          | 1.684(7)  | As(1)-O(8)         | 1.686(7)  |
| As(1)-O(1)          | 1.703(7)  | Cu(5)-N(11)          | 1.966(9)  | Cu(5)-N(9)         | 1.975(9)  |
| Cu(5)-N(10)         | 2.042(9)  | Cu(5)-Cl(2)#2        | 2.594(4)  | Cu(1)-N(5)         | 1.965(9)  |
| Cu(1)-N(6)          | 1.976(10) | Cu(1)-O(25)          | 2.198(8)  | Cu(1)-Cl(1)        | 2.431(4)  |
| Cu(3)-N(4)#3        | 1.977(9)  | Cu(3)-N(2)           | 2.044(10) | Cu(3)-Cl(2)        | 2.266(3)  |
| Cu(3)-O(31)#4       | 2.627(9)  | Cl(2)-Cu(4)#4        | 2.535(3)  | Cu(2)-N(3)         | 2.010(10) |
| Cu(2)-N(1)          | 2.087(11) | Cu(2)-Cl(1)          | 2.221(3)  | Cu(2)-O(23)#5      | 2.556(8)  |
| Cu(4)-N(7)          | 1.942(10) | Cu(4)-N(8)           | 1.981(9)  | Cu(4)-O(31)        | 2.298(8)  |
| Cu(4)-Cl(2)#6       | 2.535(3)  | Cl(2)-Cu(5)#2        | 2.594(4)  | O(29)-W(9)#1       | 1.912(7)  |
| O(21)-W(7)#1        | 1.927(7)  | O(22)-W(6)#1         | 1.888(7)  | O(13)-W(9)#1       | 2.340(7)  |
| O(23)-Cu(2)#7       | 2.556(8)  | O(26)-W(5)#1         | 1.897(7)  | O(31)-Cu(3)#6      | 2.627(8)  |
| As(1)-O(6)-Mo(3)    | 129.9(3)  |                      |           |                    |           |
| O(19)-W(8)-O(18)    | 101.3(3)  | O(19)-W(8)-O(15)     | 101.0(3)  | O(18)-W(8)-O(15)   | 157.6(3)  |
| O(19)-W(8)-O(11)#1  | 98.0(4)   | O(18)-W(8)-O(11)#1   | 89.9(3)   | O(15)-W(8)-O(11)#1 | 88.4(3)   |
| O(19)-W(8)-O(16)    | 97.2(4)   | O(18)-W(8)-O(16)     | 87.3(3)   | O(15)-W(8)-O(16)   | 88.6(3)   |
| O(11)#1-W(8)-O(16)  | 164.8(3)  | O(19)-W(8)-O(17)     | 173.6(3)  | O(18)-W(8)-O(17)   | 72.4(3)   |
| O(15)-W(8)-O(17)    | 85.2(3)   | O(11)#1-W(8)-O(17)   | 83.1(3)   | O(16)-W(8)-O(17)   | 81.8(3)   |
| O(12)-W(6)-O(11)    | 99.5(4)   | O(12)-W(6)-O(22)#1   | 102.3(3)  | O(11)-W(6)-O(22)#1 | 92.4(3)   |
| O(12)-W(6)-O(10)    | 100.1(3)  | O(11)-W(6)-O(10)     | 91.1(3)   | O(22)#1-W(6)-O(10) | 156.4(3)  |
| O(12)-W(6)-O(9)     | 95.3(3)   | O(11)-W(6)-O(9)      | 165.2(3)  | O(22)#1-W(6)-O(9)  | 85.3(3)   |
| O(10)-W(6)-O(9)     | 85.4(3)   | O(12)-W(6)-O(8)      | 170.6(3)  | O(11)-W(6)-O(8)    | 84.9(3)   |
| O(22)#1-W(6)-O(8)   | 85.7(3)   | O(10)-W(6)-O(8)      | 71.4(3)   | O(9)-W(6)-O(8)     | 80.4(3)   |
| O(23)-W(9)-O(22)    | 102.7(3)  | O(23)-W(9)-O(21)     | 102.1(3)  | O(23)-W(9)-O(29)#1 | 98.6(3)   |
| O(13)-As(1)-O(17)   | 112.2(3)  | O(13)-As(1)-O(1)     | 106.9(3)  | O(8)-As(1)-O(1)    | 107.0(3)  |
| N(11)-Cu(5)-N(9)    | 131.9(4)  | N(11)-Cu(5)-N(10)    | 107.5(4)  | N(9)-Cu(5)-N(10)   | 112.2(4)  |
| N(11)-Cu(5)-Cl(2)#2 | 99.6(3)   | N(9)-Cu(5)-Cl(2)#2   | 102.3(3)  | N(5)-Cu(1)-N(6)    | 145.8(5)  |
| N(5)-Cu(1)-O(25)    | 94.2(3)   | N(6)-Cu(1)-O(25)     | 92.6(3)   | N(5)-Cu(1)-Cl(1)   | 107.5(3)  |
| O(25)-Cu(1)-Cl(1)   | 107.6(3)  | N(5)-Cu(1)-Cu(2)     | 108.4(3)  | N(4)#3-Cu(3)-N(2)  | 113.5(4)  |
| N(2)-Cu(3)-Cl(2)    | 106.4(3)  | N(4)#3-Cu(3)-O(31)#4 | 91.0(4)   | N(3)-Cu(2)-N(1)    | 103.4(4)  |
| N(3)-Cu(2)-Cl(1)    | 141.6(3)  | N(3)-Cu(2)-O(23)#5   | 95.7(4)   | N(1)-Cu(2)-O(23)#5 | 88.5(4)   |
| Cl(1)-Cu(2)-O(23)#5 | 101.1(2)  | O(31)-Cu(4)-Cl(2)#6  | 90.9(2)   | W(9)-O(23)-Cu(2)#7 | 149.8(4)  |

Symmetry transformations used to generate equivalent atoms: #1 -x+1,y,-z+3/2; #2 -x+1/2,-y+5/2,-z+2; #3 -x+1,-y+3,-z+2; #4 x,y+1,z; #5 -x+1,y+1,-z+3/2; #6 x,y-1,z; #7 -x+1,y-1,-z+3/2;

**Table S2** Selected hydrogen bond lengths ( ) and bond angles (°) of compound **1**

| D-H...A                | d(D...H)nm | d(H...A)nm | d(D...A)nm | ∠(DHA)° |
|------------------------|------------|------------|------------|---------|
| C(2)--H(2)...O(12)#1   | 0.93       | 2.51       | 3.129(16)  | 124     |
| C(6)--H(6)...O(31)#1   | 0.93       | 2.48       | 3.181(16)  | 132     |
| C(7)--H(7)...O(19)#2   | 0.93       | 2.47       | 3.229(15)  | 139     |
| C(8)--H(8)...O(23)#2   | 0.93       | 2.58       | 3.280(16)  | 132     |
| C(10)--H(10)...O(30)#3 | 0.93       | 2.30       | 3.000(14)  | 131     |
| C(10)--H(10)...O(4)#4  | 0.93       | 2.33       | 3.102(15)  | 140     |
| C(17)--H(17)...O(24)#4 | 0.93       | 2.40       | 3.075(15)  | 129     |
| C(19)--H(19)...O(28)#4 | 0.93       | 2.53       | 3.284(16)  | 138     |
| C(22)--H(22)...O(24)#4 | 0.93       | 2.57       | 3.085(16)  | 115     |

Symmetry transformations used to generate equivalent atoms: #1 1-x,2-y,2-z; #2 1-x,1+y,3/2-z; #3 x,1+y,z; #4 x,1-y,1/2+z;

**Table S3** The BVS calculation result of As, W, and Cu atoms in compound **1**

| Code | Bond Valence | Code | Bond Valence |
|------|--------------|------|--------------|
| As1  | 5.260        | W8   | 6.209        |
| W1   | 6.245        | W9   | 6.181        |
| W2   | 6.219        | Cu1  | 1.210        |
| W3   | 6.221        | Cu2  | 0.980        |
| W4   | 6.017        | Cu3  | 1.006        |
| W5   | 6.182        | Cu4  | 1.124        |
| W6   | 6.127        | Cu5  | 1.198        |
| W7   | 6.190        |      |              |
